# Supplementary material for: Biological evaluation of a mechanical ventilator that operates by controlling an automated manual resuscitator. A descriptive study in swine
Source: PubMed Central journal article supplement (PMC8893637; doi:10.1371/journal.pone.0264774), 2022-03-03
Supplement: pone.0264774.s001.pdf [file pone.0264774.s001.pdf]

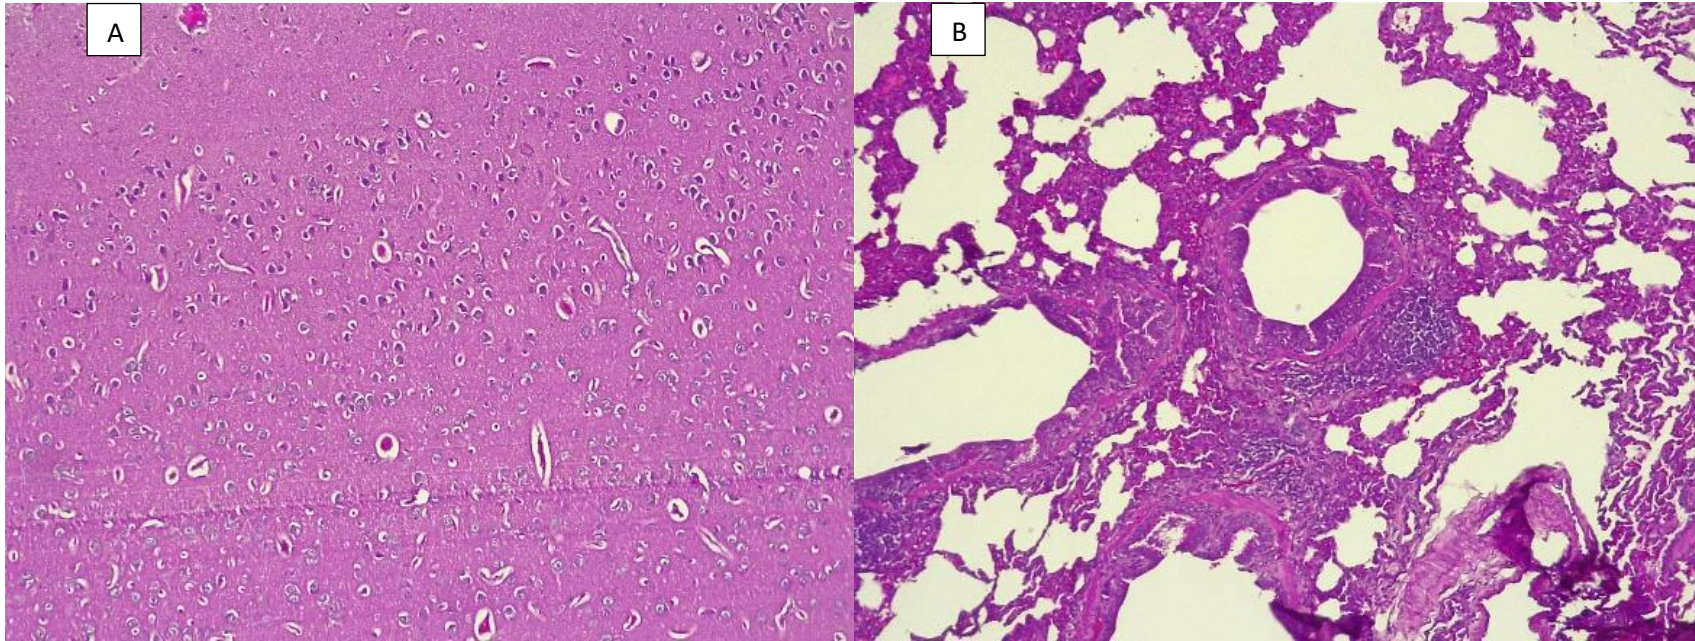

**S1 Figure. Representative histopathology images.** Representative pictures of (A) brain and (B) lung tissues. There were not changes associated with hypoxia; brain tissue shows only mild post-mortem retraction. Lung tissue shows mild lymphocyte interstitial infiltration probably related to previous pulmonary infection.

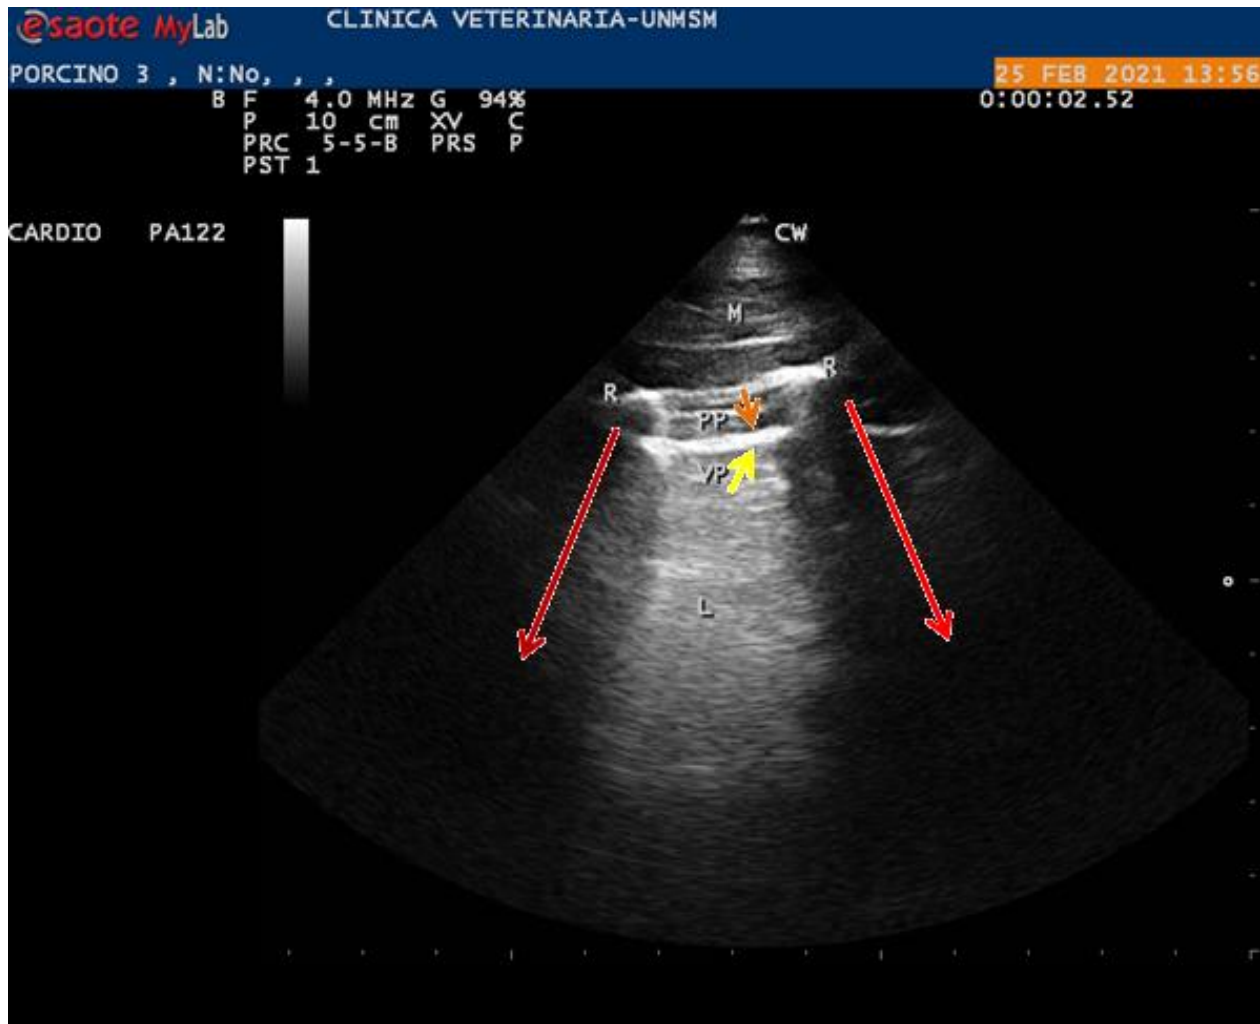

**S2 Figure. Representative image of chest ultrasound.** CW: Chest Wall; M: Muscle; PP: Parietal Pleura (orange arrow); VP: Visceral Pleura (yellow arrow); L: Lung; R: Ribs (red arrows).

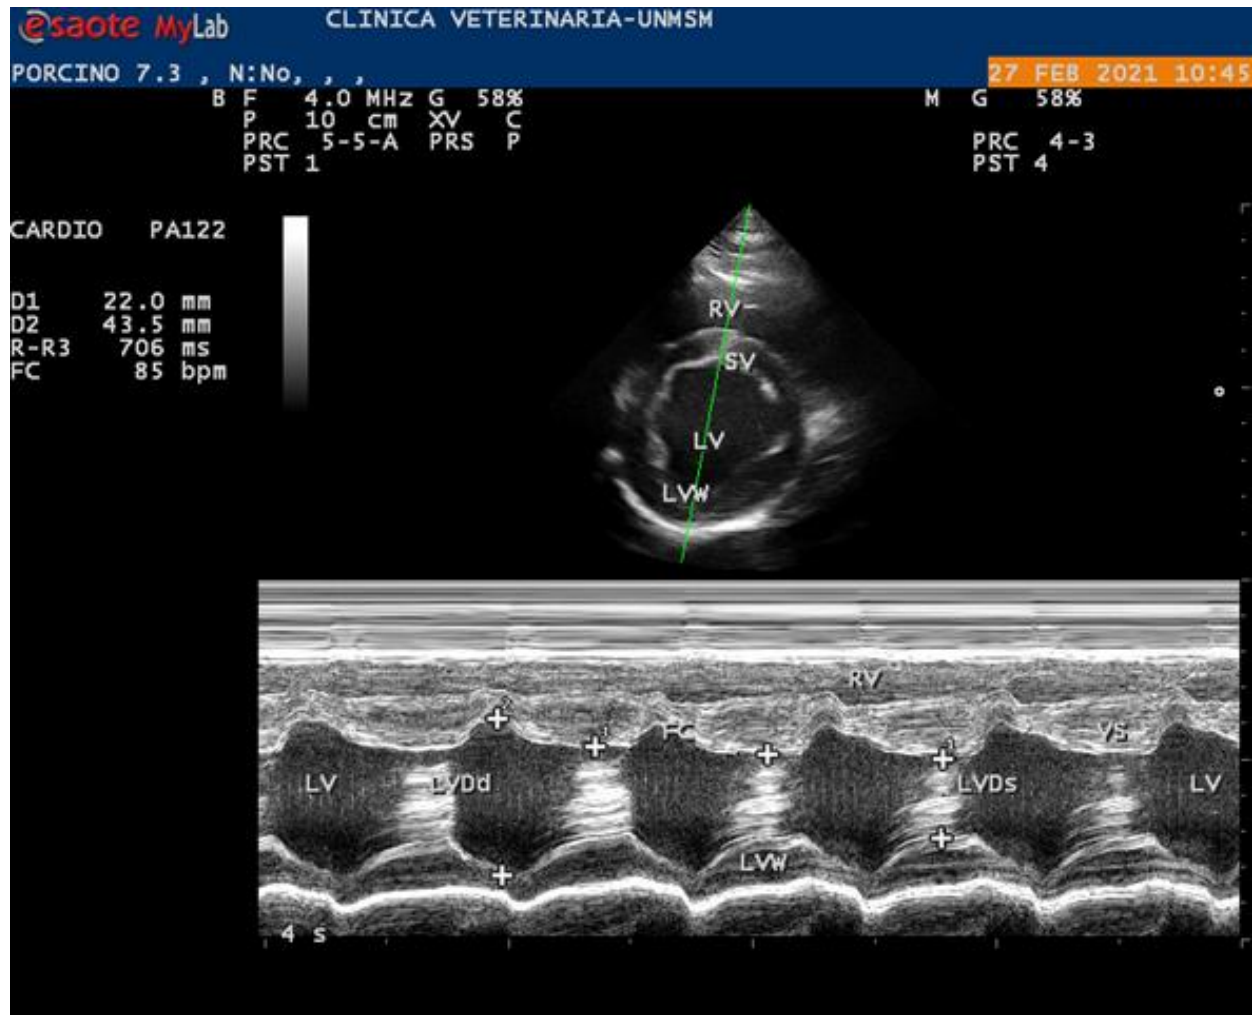

**S3 Figure. Representative echocardiography image.** Representative image describing contractile functions. RV: Right Ventricle; VS: Ventricular Septum; LV: Left Ventricle; LVW: Left Ventricular Wall.

**S1 Table. Histopathological analysis per organ.**

| Swine # | Lung                                                                                                                                                                                                    | Kidney                                                                     | Liver                                                     | Brain                                                                                                                                | Heart                                | General comments                                                                                             |
|---------|---------------------------------------------------------------------------------------------------------------------------------------------------------------------------------------------------------|----------------------------------------------------------------------------|-----------------------------------------------------------|--------------------------------------------------------------------------------------------------------------------------------------|--------------------------------------|--------------------------------------------------------------------------------------------------------------|
| 1       | Right lung presents mild acute diffuse nonsuppurative interstitial pneumonia with mild BALT aggregate hyperplasia.                                                                                      | Nephrosis                                                                  | Hepatic steatosis with centrilobular congestion.          | No major changes.                                                                                                                    | No major changes.                    | The observed alterations suggest an anterior pneumonic process, no early hypoxic lesions are observed.       |
| 2       | Severe acute diffuse nonsuppurative interstitial pneumonia in some areas, little peribronchial lymphocytic infiltration, in some bronchioles presence of exudate.                                       | Mild acute multifocal nonsuppurative nephritis, nephrosis.                 | Hepatositis with few perilobular lymphocytic infiltration | Mild acute multifocal non-suppurative meningitis, gliosis, satellitosis, perivascular and neuronal edema, little neuronal death.     | No major changes.                    | The observed alterations suggest an infectious process, no early hypoxic lesions are observed.               |
| 3       | Moderate acute diffuse nonsuppurative interstitial pneumonia with BALT aggregation hyperplasia in some areas, scant infiltration of peribronchial lymphocytes, in some bronchioles presence of exudate. | Mild acute multifocal nonsuppurative nephritis, nephrosis.                 | Hepatositis                                               | Mild acute focal non-suppurative meningitis with little blood extravasation, gliosis, satellitosis, perineuronal and vascular edema. | Hypertrophy of cardiac muscle.       | The observed alterations suggest an infectious process, no early hypoxic lesions are observed.               |
| 4       | Mild acute diffuse nonsuppurative interstitial pneumonia, scant number of lymphocytes around the bronchiole and bronchus.                                                                               | Mild to moderate acute multifocal nonsuppurative nephritis with nephrosis. | Mild acute focal nonsuppurative hepatitis with hepatosis. | Few perivascular lymphocytes with perivascular edema.                                                                                | No major changes.                    | The observed alterations suggest an infectious process (viral type?), No early hypoxic lesions are observed. |
| 5       | Severe acute diffuse nonsuppurative interstitial pneumonia in one of the lungs. The other presents mild acute diffuse nonsuppurative interstitial pneumonia.                                            | Moderate acute multifocal nephritis with marrow atrophy and nephrosis.     | No major changes.                                         | No major changes.                                                                                                                    | Few lymphocytes in the interstitium. | The observed alterations suggest an infectious process (viral type?), No early hypoxic lesions are observed. |

|   |                                                                                                             |                                                                             |                                 |                                                                                                                                                                   |                   |                                                                                                                                     |
|---|-------------------------------------------------------------------------------------------------------------|-----------------------------------------------------------------------------|---------------------------------|-------------------------------------------------------------------------------------------------------------------------------------------------------------------|-------------------|-------------------------------------------------------------------------------------------------------------------------------------|
| 6 | Moderate acute diffuse nonsuppurative interstitial pneumonia, with mild BALT aggregate hyperplasia.         | Nephrosis, few lymphocytes in the interstitium.                             | Some hepatocytes with steatosis | Mild acute multifocal nonsuppurative meningoencephalitis with vacuolization in the area, satellitosis and gliosis.                                                | No major changes. | The observed alterations suggest an infectious process (viral type?), No early hypoxic lesions are observed.                        |
| 7 | Moderate to mild acute diffuse nonsuppurative interstitial pneumonia, with mild BALT aggregate hyperplasia. | Nephrosis                                                                   | Hepatositis                     | Few lymphocytes in the meninges with perivascular edema, satellitosis and gliosis.                                                                                | No major changes. | The observed alterations suggest an infectious process, no early hypoxic lesions are observed.                                      |
| 8 | Moderate to mild acute diffuse nonsuppurative interstitial pneumonia, with BALT aggregate hyperplasia.      | Mild acute multifocal nonsuppurative interstitial nephritis with nephrosis. | No major changes.               | Mild acute focal nonsuppurative encephalitis with vacuolization of the parenchyma, perivascular edema, satellitosis and gliosis. Few lymphocytes in the meninges. | No major changes. | The observed alterations suggest a previous infectious process, perhaps from a viral source. No early hypoxic lesions are observed. |

Summary of histopathological findings in five organs: Lung, kidney, liver, brain, and heart analyzed for early lesions related to barotrauma or hypoxia. Results were reported by the Laboratory of Histology, Embryology and Animal Pathology at Faculty of Veterinary Medicine, Universidad Nacional Mayor de San Marcos. BALT: Bronchus-associated lymphoid tissue.

**S2 Table. Comparison of baseline physiological values (t<sub>0</sub>) and reference values.**

| Parameters                           | Current study |       | Reported in literature |       | T-test p-value |
|--------------------------------------|---------------|-------|------------------------|-------|----------------|
|                                      | n             | Mean  | n                      | Mean  |                |
| Temperature (°C)                     | 8             | 36.6  | 30                     | 38.9  | 0.157          |
| pH                                   | 8             | 7.395 | 86                     | 7.414 | 0.261          |
| HCO <sub>3</sub> <sup>-</sup> (mmHg) | 8             | 32.3  | 38                     | 23.7  | 0.001          |
| Lactate (mmol/l)                     | 8             | 1.41  | 25                     | 1.46  | 0.822          |
| BEecf (mmol/l)                       | 8             | 7.2   | 38                     | 0.06  | 0.003          |
| SaO <sub>2</sub> (%)                 | 8             | 100   | 56                     | 98.2  | <0.0001        |
| PaO <sub>2</sub> (mmHg)              | 8             | 334   | 86                     | 161.9 | <0.0001        |
| PaCO <sub>2</sub> (mmHg)             | 8             | 52.9  | 86                     | 39.5  | 0.218          |
| Respiratory rate (breaths/min)       | 8             | 37.1  | 30                     | 31    | 0.266          |
| Heart rate (beats/min)               | 8             | 85.4  | 53                     | 114   | 0.752          |
| Cardiac output (L/min)               | 8             | 5.892 | 23                     | 5.542 | 0.146          |

T-test was performed to analyze differences between physiological values described previously in the literature (Table 1) and our baseline data set (Table 3), significant differences were established at p-value <0.05.

**S3 Table. Biochemical parameters.**

| Swine # | Time           | pH    | PaCO <sub>2</sub> (mmHg) | PaO <sub>2</sub> (mmHg) | BE <sub>ef</sub> (mmol/l) | HCO <sub>3</sub> <sup>-</sup> (mmHg) | ETCO <sub>2</sub> (mmHg) | SaO <sub>2</sub> (%) | Lactate (mmol/l) | Respiratory mechanism |
|---------|----------------|-------|--------------------------|-------------------------|---------------------------|--------------------------------------|--------------------------|----------------------|------------------|-----------------------|
| 1       | t <sub>0</sub> | 7.329 | 61.4                     | 361                     | 6                         | 32.3                                 | 34.0                     | 100                  | 1.27             | Autonomous            |
| 2       | t <sub>0</sub> | 7.428 | 45.1                     | 327                     | 5                         | 29.8                                 | 31.0                     | 100                  | 1.88             | Autonomous            |
| 3       | t <sub>0</sub> | 7.372 | 52.9                     | 289                     | 5                         | 30.7                                 | 32.0                     | 100                  | 1.28             | Autonomous            |
| 4       | t <sub>0</sub> | 7.412 | 48.0                     | 317                     | 6                         | 30.6                                 | 32.0                     | 100                  | 1.81             | Autonomous            |
| 5       | t <sub>0</sub> | 7.363 | 60.0                     | 529                     | 9                         | 34.2                                 | 36.0                     | 100                  | 0.63             | Autonomous            |
| 6       | t <sub>0</sub> | 7.407 | 55.2                     | 414                     | 10                        | 34.8                                 | 36.0                     | 100                  | 1.20             | Autonomous            |
| 7       | t <sub>0</sub> | 7.431 | 48.6                     | 267                     | 8                         | 32.3                                 | 34.0                     | 100                  | 1.44             | Autonomous            |
| 8       | t <sub>0</sub> | 7.415 | 52.3                     | 169                     | 9                         | 33.5                                 | 35.0                     | 100                  | 1.80             | Autonomous            |
| 1       | t <sub>1</sub> | 7.402 | 47.0                     | 240                     | 4                         | 29.2                                 | 31.0                     | 100                  | 2.57             | Mechanical            |
| 2       | t <sub>1</sub> | 7.312 | 61.1                     | 282                     | 5                         | 30.9                                 | 33.0                     | 100                  | 4.32             | Mechanical            |
| 3       | t <sub>1</sub> | 7.290 | 67.4                     | 29                      | 6                         | 32.4                                 | 34.0                     | 45                   | 0.88             | Mechanical            |
| 4       | t <sub>1</sub> | 7.267 | 68.7                     | 86                      | 4                         | 31.3                                 | 33.0                     | 94                   | 1.46             | Mechanical            |
| 5       | t <sub>1</sub> | 7.371 | 53.0                     | 120                     | 5                         | 30.7                                 | 32.0                     | 98                   | 0.59             | Mechanical            |
| 6       | t <sub>1</sub> | 7.362 | 52.3                     | 53                      | 4                         | 29.7                                 | 31.0                     | 85                   | 0.75             | Mechanical            |
| 7       | t <sub>1</sub> | 7.467 | 43.7                     | 179                     | 8                         | 31.6                                 | 33.0                     | 100                  | 1.71             | Mechanical            |
| 8       | t <sub>1</sub> | 7.418 | 46.1                     | 149                     | 5                         | 29.8                                 | 31.0                     | 99                   | 3.78             | Mechanical            |

|   |                |       |      |     |    |      |      |     |      |            |
|---|----------------|-------|------|-----|----|------|------|-----|------|------------|
| 1 | t <sub>2</sub> | 7.389 | 52.0 | 248 | 6  | 31.4 | 33.0 | 100 | 1.83 | Mechanical |
| 2 | t <sub>2</sub> | 7.369 | 48.2 | 278 | 3  | 27.8 | 29.0 | 100 | 6.95 | Mechanical |
| 3 | t <sub>2</sub> | 7.332 | 56.7 | 104 | 4  | 30.1 | 32.0 | 97  | 1.90 | Mechanical |
| 4 | t <sub>2</sub> | 7.398 | 50.2 | 197 | 6  | 30.9 | 32.0 | 100 | 1.21 | Mechanical |
| 5 | t <sub>2</sub> | 7.525 | 36.5 | 135 | 7  | 30.2 | 31.0 | 99  | 0.57 | Mechanical |
| 6 | t <sub>2</sub> | 7.522 | 37.9 | 213 | 8  | 31.1 | 32.0 | 100 | 1.35 | Mechanical |
| 7 | t <sub>2</sub> | 7.509 | 40.1 | 158 | 9  | 31.9 | 33.0 | 100 | 1.44 | Mechanical |
| 8 | t <sub>2</sub> | 7.429 | 45.9 | 169 | 6  | 30.4 | 32.0 | 100 | 4.30 | Mechanical |
| 1 | t <sub>3</sub> | 7.439 | 44.3 | 247 | 6  | 30.0 | 31.0 | 100 | 1.53 | Mechanical |
| 2 | t <sub>3</sub> | 7.364 | 48.4 | 279 | 2  | 27.6 | 29.0 | 100 | 7.83 | Mechanical |
| 3 | t <sub>3</sub> | 7.369 | 53.3 | 148 | 5  | 30.7 | 32.0 | 99  | 1.63 | Mechanical |
| 4 | t <sub>3</sub> | 7.416 | 52.6 | 219 | 9  | 33.8 | 35.0 | 100 | 1.05 | Mechanical |
| 5 | t <sub>3</sub> | 7.490 | 34.6 | 142 | 3  | 26.4 | 27.0 | 99  | 3.09 | Mechanical |
| 6 | t <sub>3</sub> | 7.557 | 35.5 | 207 | 9  | 31.6 | 33.0 | 100 | 1.18 | Mechanical |
| 7 | t <sub>3</sub> | 7.527 | 39.2 | 186 | 10 | 32.5 | 34.0 | 100 | 1.28 | Mechanical |
| 8 | t <sub>3</sub> | 7.499 | 40.8 | 204 | 9  | 31.7 | 33.0 | 100 | 2.96 | Mechanical |
| 1 | t <sub>4</sub> | 7.556 | 35.3 | 285 | 9  | 31.3 | 32.0 | 100 | 1.84 | Mechanical |
| 2 | t <sub>4</sub> | 7.362 | 44.7 | 267 | 0  | 25.3 | 27.0 | 100 | 9.21 | Mechanical |
| 3 | t <sub>4</sub> | 7.422 | 48.1 | 127 | 7  | 31.3 | 33.0 | 99  | 0.98 | Mechanical |



|   |                |       |      |     |    |      |      |     |      |            |
|---|----------------|-------|------|-----|----|------|------|-----|------|------------|
| 4 | t <sub>4</sub> | 7.444 | 44.9 | 222 | 7  | 30.8 | 30.8 | 100 | 1.18 | Mechanical |
| 5 | t <sub>4</sub> | 7.470 | 36.4 | 142 | 3  | 26.5 | 28.0 | 99  | 4.74 | Mechanical |
| 6 | t <sub>4</sub> | 7.483 | 43.3 | 226 | 9  | 32.4 | 34.0 | 100 | 1.16 | Mechanical |
| 7 | t <sub>4</sub> | 7.537 | 40.0 | 170 | 11 | 34.0 | 35.0 | 100 | 1.45 | Mechanical |
| 8 | t <sub>4</sub> | 7.532 | 38.7 | 208 | 10 | 32.5 | 34.0 | 100 | 1.45 | Mechanical |
| 1 | t <sub>5</sub> | 7.460 | 44.5 | 277 | 8  | 31.6 | 33.0 | 100 | 1.06 | Mechanical |
| 2 | t <sub>5</sub> | 7.355 | 48.2 | 290 | 1  | 26.9 | 28.0 | 100 | 8.89 | Mechanical |
| 3 | t <sub>5</sub> | 7.482 | 42.7 | 194 | 8  | 31.9 | 33.0 | 100 | 1.07 | Mechanical |
| 4 | t <sub>5</sub> | 7.434 | 48.7 | 280 | 8  | 32.6 | 32.0 | 100 | 1.02 | Mechanical |
| 5 | t <sub>5</sub> | 7.416 | 45.7 | 252 | 5  | 29.4 | 31.0 | 100 | 4.57 | Mechanical |
| 6 | t <sub>5</sub> | 7.475 | 43.3 | 235 | 8  | 31.9 | 33.0 | 100 | 1.14 | Mechanical |
| 7 | t <sub>5</sub> | 7.515 | 42.1 | 212 | 11 | 34.0 | 35.0 | 100 | 1.44 | Mechanical |
| 8 | t <sub>5</sub> | 7.511 | 42.2 | 185 | 11 | 33.8 | 35.0 | 100 | 1.34 | Mechanical |
| 1 | t <sub>6</sub> | 7.472 | 42.6 | 277 | 8  | 31.1 | 32.0 | 100 | 0.81 | Mechanical |
| 2 | t <sub>6</sub> | 7.193 | 72.4 | 69  | 0  | 27.9 | 30.0 | 88  | 7.94 | Mechanical |
| 3 | t <sub>6</sub> | 7.478 | 42.9 | 194 | 8  | 31.8 | 33.0 | 100 | 0.99 | Mechanical |
| 4 | t <sub>6</sub> | 7.492 | 43.2 | 230 | 10 | 33.1 | 34.0 | 100 | 0.94 | Mechanical |
| 5 | t <sub>6</sub> | 7.474 | 41.6 | 202 | 7  | 30.6 | 32.0 | 100 | 1.98 | Mechanical |
| 6 | t <sub>6</sub> | 7.444 | 47.2 | 211 | 8  | 32.3 | 34.0 | 100 | 1.00 | Mechanical |

|   |                |       |      |     |    |      |      |     |      |            |
|---|----------------|-------|------|-----|----|------|------|-----|------|------------|
| 7 | t <sub>6</sub> | 7.500 | 42.7 | 178 | 10 | 33.3 | 35.0 | 100 | 1.47 | Mechanical |
| 8 | t <sub>6</sub> | 7.486 | 45.8 | 177 | 11 | 34.6 | 34.6 | 100 | 1.14 | Mechanical |
| 1 | t <sub>7</sub> | 7.520 | 40.1 | 249 | 10 | 32.7 | 34.0 | 100 | 0.69 | Mechanical |
| 2 | t <sub>7</sub> | 7.371 | 54.8 | 178 | 6  | 31.7 | 33.0 | 100 | 3.79 | Mechanical |
| 3 | t <sub>7</sub> | 7.461 | 44.7 | 124 | 8  | 31.9 | 33.0 | 99  | 0.92 | Mechanical |
| 4 | t <sub>7</sub> | 7.513 | 40.3 | 155 | 9  | 32.4 | 34.0 | 100 | 0.87 | Mechanical |
| 5 | t <sub>7</sub> | 7.473 | 42.2 | 153 | 7  | 30.9 | 32.0 | 99  | 1.39 | Mechanical |
| 6 | t <sub>7</sub> | 7.420 | 51.5 | 278 | 9  | 33.4 | 35.0 | 100 | 0.90 | Mechanical |
| 7 | t <sub>7</sub> | 7.464 | 48.3 | 159 | 11 | 34.6 | 36.0 | 99  | 1.28 | Mechanical |
| 8 | t <sub>7</sub> | 7.503 | 44.0 | 204 | 11 | 34.6 | 34.6 | 100 | 1.16 | Mechanical |

Values of different parameters of arterial blood biochemistry obtained at the different time-points of the pre-clinical trial as explained in Figure 2. pH: potential of hydrogen, HCO<sub>3</sub><sup>-</sup>: bicarbonate ion, BEecf: base excess in the extracellular fluid compartment, SaO<sub>2</sub>: arterial oxygen saturation, PaO<sub>2</sub>: arterial oxygen pressure, PaCO<sub>2</sub>: arterial carbon dioxide pressure, ETCO<sub>2</sub>: end-tidal carbon dioxide.

**S4 Table. Cardio-respiratory parameters at different time-points.**

| Swine # | Time           | Respiratory rate (breaths/min) | Heart rate (beats/min) | LVEDV (mL) | LVESV (mL) | Cardiac output (L/min) |
|---------|----------------|--------------------------------|------------------------|------------|------------|------------------------|
| 1       | t <sub>0</sub> | 40                             | 83                     | nr         | nr         | 3.203                  |
| 2       | t <sub>0</sub> | 56                             | 101                    | nr         | nr         | 8.171                  |
| 3       | t <sub>0</sub> | 40                             | 81                     | nr         | nr         | 6.460                  |
| 4       | t <sub>0</sub> | 48                             | 69                     | nr         | nr         | 3.969                  |
| 4       | t <sub>4</sub> | nr                             | 69                     | 70.42      | 12.89      | 3.969                  |
| 4       | t <sub>6</sub> | nr                             | 60                     | 105.44     | 21.01      | 5.065                  |
| 5       | t <sub>0</sub> | 32                             | 70                     | 105.44     | 14.76      | 6.347                  |
| 5       | t <sub>4</sub> | nr                             | 105                    | 75.95      | 8.39       | 7.093                  |
| 5       | t <sub>6</sub> | nr                             | 86                     | 79.9       | 20.37      | 5.120                  |
| 6       | t <sub>0</sub> | 25                             | 86                     | 83.07      | 18.72      | 5.534                  |
| 6       | t <sub>4</sub> | nr                             | 77                     | 95.36      | 25.55      | 5.375                  |
| 6       | t <sub>6</sub> | nr                             | 70                     | 73.79      | 10.14      | 4.455                  |
| 7       | t <sub>0</sub> | 20                             | 84                     | 105.44     | 22.09      | 7.001                  |
| 7       | t <sub>4</sub> | nr                             | 74                     | 95.41      | 16.20      | 5.713                  |
| 7       | t <sub>6</sub> | nr                             | 87                     | 87.68      | 12.25      | 6.562                  |
| 8       | t <sub>0</sub> | 36                             | 99                     | 67.53      | 17.34      | 4.968                  |

|   |                |    |    |       |       |       |
|---|----------------|----|----|-------|-------|-------|
| 8 | t <sub>4</sub> | nr | 92 | 82.61 | 12.89 | 6.414 |
| 8 | t <sub>6</sub> | nr | 84 | 85.36 | 23.68 | 5.181 |

Values of cardiovascular and respiratory parameters measured at t<sub>0</sub>, t<sub>4</sub> (2 hours) and t<sub>6</sub> (4 hours) of the pre-clinical trial as explained in Figure 2. LVEDV: Left ventricular end diastolic volumen; LVESV: left ventricular end systolic volumen; nr: not recorded.
